# Supplementary material for: Decreased prevalence of diabetes in marijuana users: cross-sectional data from the National Health and Nutrition Examination Survey (NHANES) III
Source: HighWire-hosted journal article supplement (doi:10.1136/bmjopen-2011-000494), 2012-01-01

Supplement Table 1. Age adjusted prevalence of chronic diseases of adults 20-59 years old who were self-identified as marijuana-users or non-marijuana-users (N=10,896).

|                       | Non-marijuana-users<br>Weighted % | Marijuana-users<br>(Weighted %) |
|-----------------------|-----------------------------------|---------------------------------|
| Diabetes Mellitus     | 4.3                               | 2.9*                            |
| Hypertension          | 17.8                              | 18.9                            |
| Stroke                | 0.69                              | 0.32                            |
| Myocardial infarction | 1.1                               | 1.2                             |
| Heart failure         | 0.66                              | 0.82                            |

\* P<0.001

Supplement Table 2. Prevalence of marijuana use by DM as diagnosed by self-report and compared to laboratory evidence of hyperglycemia

| Diagnosis                      | Total population |            | Population with DM                 |                                |                                                       |                                                 |
|--------------------------------|------------------|------------|------------------------------------|--------------------------------|-------------------------------------------------------|-------------------------------------------------|
|                                | Without DM       | *With DM   | DM diagnosed by yes to self-report | DM diagnosed by FBG $\geq$ 126 | DM diagnosed by yes to self-report and FBG $\geq$ 126 | DM diagnosed by yes to self-report and FBG <126 |
| <b>n</b>                       | <b>10,165</b>    | <b>719</b> | <b>525</b>                         | <b>194</b>                     | <b>275</b>                                            | <b>235</b>                                      |
| <b>Marijuana-Non-users (%)</b> | 53.6             | 73.1       | 73.7                               | 71.8                           | 79.8                                                  | 65.3                                            |
| <b>Past users</b>              | 37.4             | 22.5       | 22.5                               | 22.6                           | 19.1                                                  | 27.5                                            |
| <b>Current users</b>           |                  |            |                                    |                                |                                                       |                                                 |
| 1-4 times/month                | 5.7              | 2.2        | 1.4                                | 4.4                            | 0.9                                                   | 2.1                                             |
| $\geq$ 5 times/month           | 3.3              | 2.2        | 2.4                                | 1.5                            | 0.2                                                   | 5.1                                             |
| P-value                        | #0.00001         |            | 0.43                               |                                | 0.06                                                  |                                                 |

\*With DM by self report or fasting glucose level  $\geq$ 126 mg/dL  
 #  $P < 0.0001$ ; compared to non-marijuana-users

Supplement Table 3. Variables affected the association between marijuana use and DM among adults 20-59 years old (Odds Ratios for DM) (N=8,127).

|                                         | OR (95% Confidence Interval) | %Change in the odds ratio <sup>§</sup> |
|-----------------------------------------|------------------------------|----------------------------------------|
| Marijuana use (yes)                     | <b>0.42 (0.33-0.55)*</b>     |                                        |
| Marijuana use+age                       | 0.60 (0.46-0.78)*            | <b>43%</b>                             |
| Marijuana use+gender                    | 0.42 (0.33-0.55)*            | 0%                                     |
| Marijuana use+race                      | 0.43 (0.33-0.55)*            | 2%                                     |
| Marijuana use+education                 | 0.44 (0.34-0.57)*            | 5%                                     |
| Marijuana use+BMI                       | 0.49 (0.38-0.65)*            | <b>17%</b>                             |
| Marijuana use+current cigarette smoking | 0.42 (0.32-0.55)*            | 0%                                     |
| Marijuana use+alcohol use               | 0.50 (0.38-0.66)*            | <b>19%</b>                             |
| Marijuana use+cocaine use               | 0.42 (0.33-0.54)*            | 0%                                     |
| Marijuana use+HDL                       | 0.44 (0.33-0.57)*            | 5%                                     |
| Marijuana use+LDL                       | 0.33 (0.21-0.54)*            | <b>-21%</b>                            |
| Marijuana use+total cholesterol         | 0.46 (0.35-0.59)*            | <b>10%</b>                             |
| Marijuana use+triglyceride              | 0.47 (0.36-0.6)*             | <b>12%</b>                             |
| Marijuana use+CRP                       | 0.46 (0.35-0.59)*            | <b>10%</b>                             |
| Marijuana use+White Blood Count         | 0.42 (0.32-0.54)*            | <b>0%</b>                              |
| Marijuana use + hypertension            | 0.46 (0.35-0.60)*            | <b>10%</b>                             |
| Marijuana use + stroke                  | 0.43 (0.33-0.56)*            | 2%                                     |
| Marijuana use + myocardial infarction   | 0.44 (0.34-0.57)*            | 5%                                     |
| Marijuana use + heart failure           | 0.43 (0.33-0.56)*            | 2%                                     |

\*p<.0001 on the associate of marijuana with DM.

<sup>§</sup>A change of  $\geq 10\%$  of the odds ratio indicates a confounding effect of that variable.

Supplement Fig. 1: Flow diagram for the sample selection and reasons for exclusion.

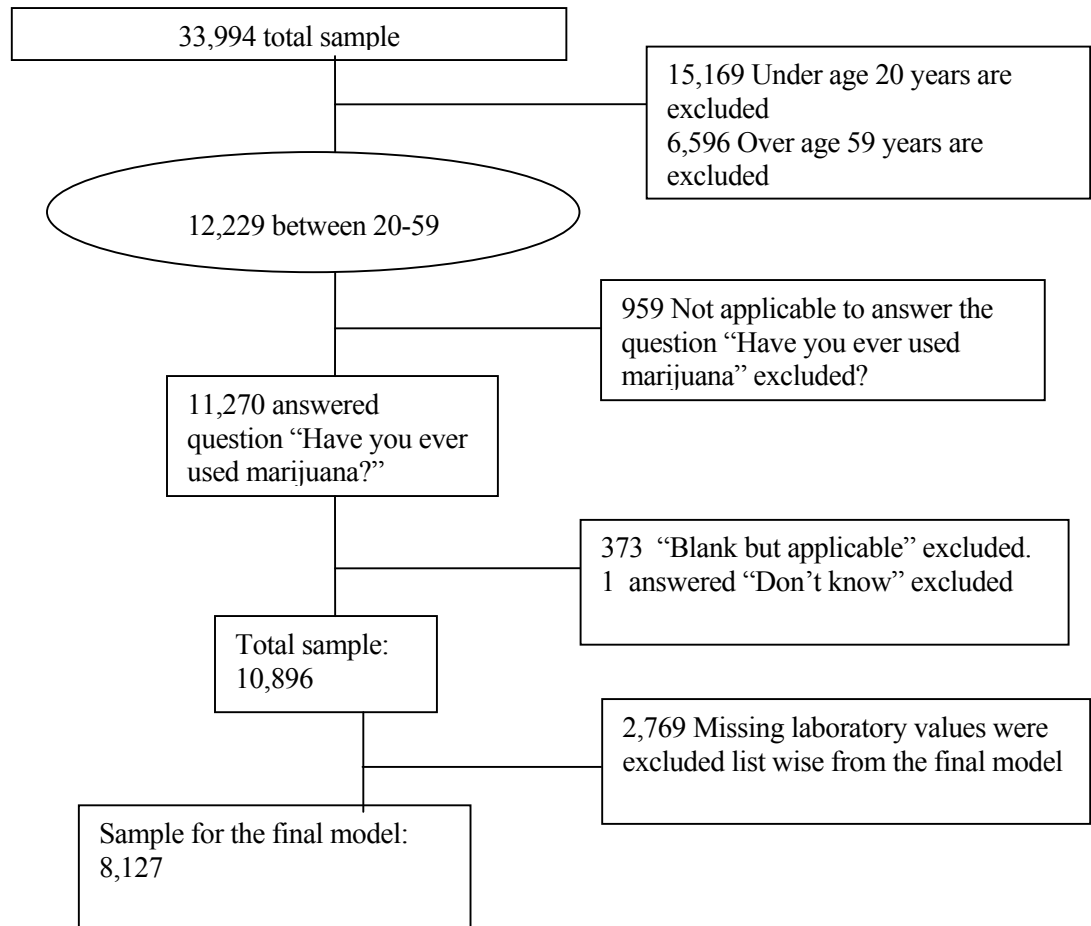

Supplement: bmjopen-2011-000494-s1.pdf [file bmjopen-2011-000494-s1.pdf]
